# Supplementary material for: Lignin–Cobalt Nano-Enabled Poly(pseudo)rotaxane Supramolecular Hydrogel for Treating Chronic Wounds
Source: MDPI journal article supplement (doi:10.3390/pharmaceutics15061717), 2023-06-13
Supplement: s1 [file s1]

# Supplementary Materials: Lignin–Cobalt Nano-Enabled Poly(pseudo)rotaxane Supramolecular Hydrogel for Treating Chronic Wounds

Giulia Crivello, Giuliana Orlandini, Angela Gala Morena, Alessandro Torchio, Clara Mattu, Monica Boffito, Tzanko Tzanov and Gianluca Ciardelli

Supplementary information:

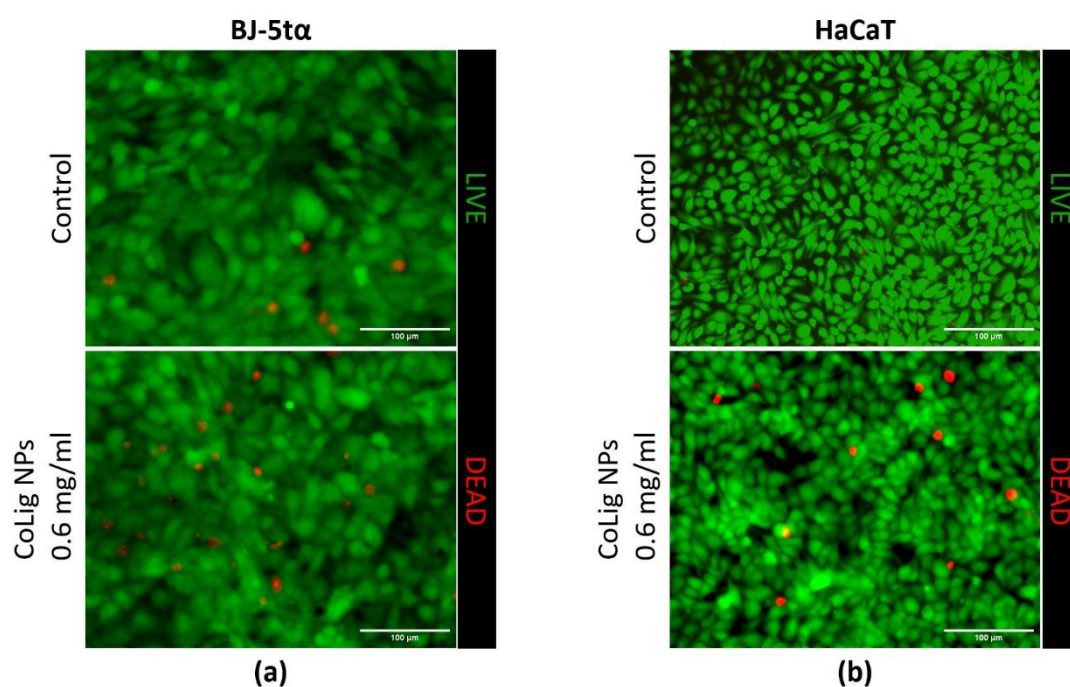

**Figure S1.** Live/dead assay for human fibroblast (BJ-5ta) and keratinocytes (HaCaT) treated with CoLig NPs at a cytocompatible concentration of 0.6 mg/ml.

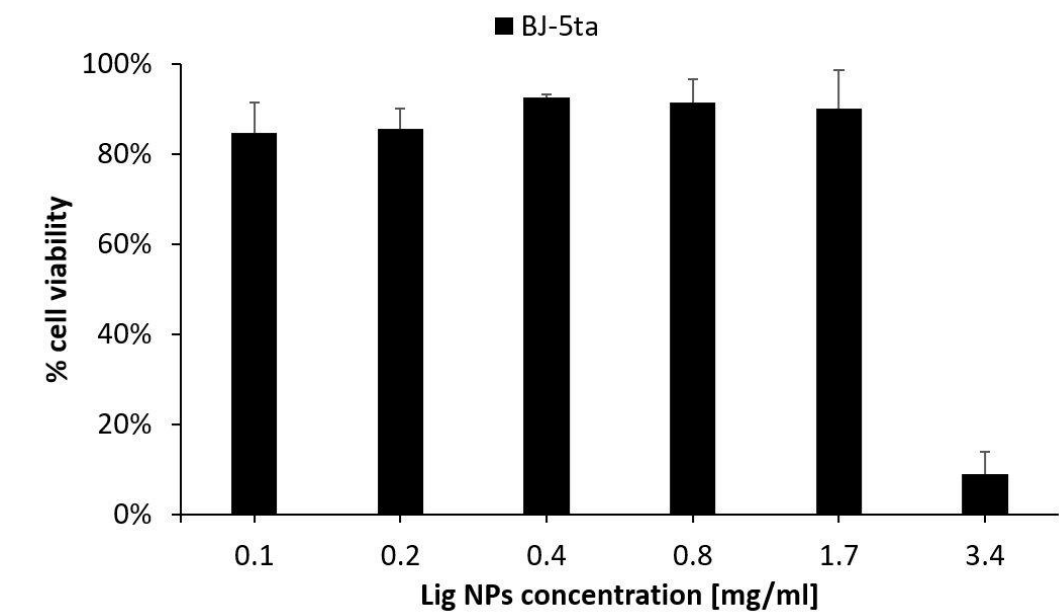

Figure S2. Cytotoxicity of Lig NPs against human fibroblast (BJ-5ta).

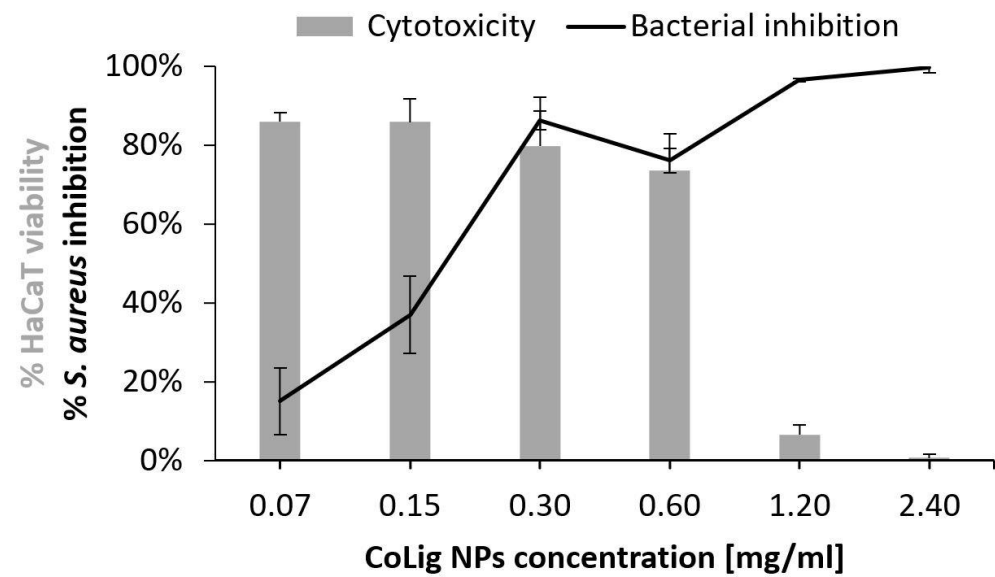

Figure S3. Comparison between cytotoxicity toward HaCaT and *S. aureus*-inhibitory ability of CoLig NPs.

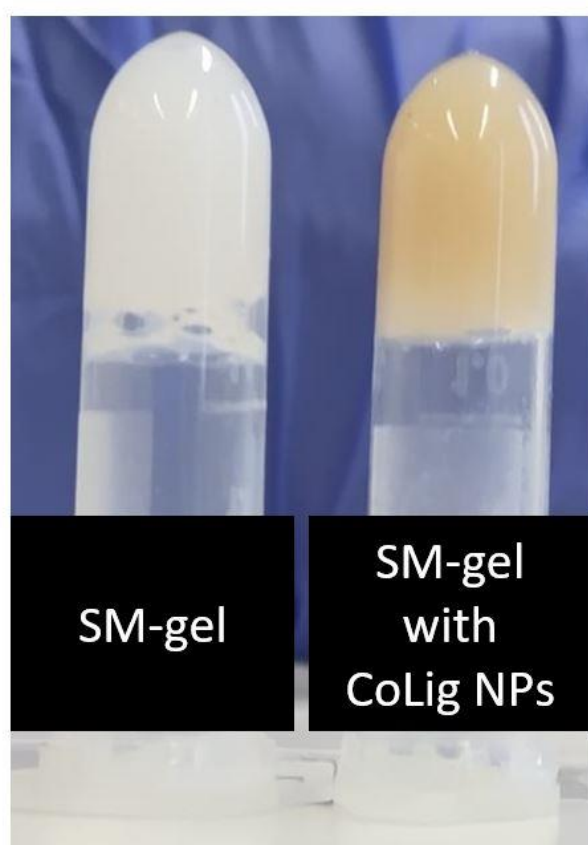

**Figure S4.** SM-gel with and without CoLig NPs. The result of the CoLig NPs integration is a homogeneous hydrogel with brown coloration related to the presence of lignin.

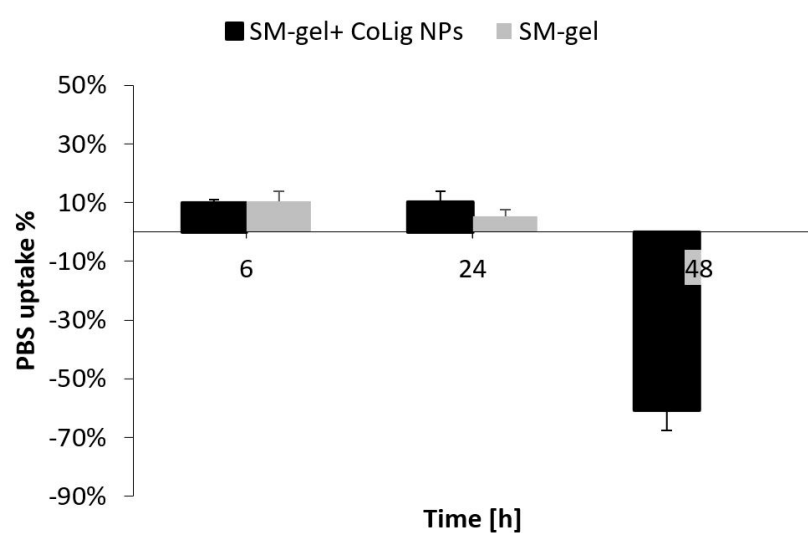

**Figure S5.** PBS uptake % of SM-gel with and without CoLig NPs.

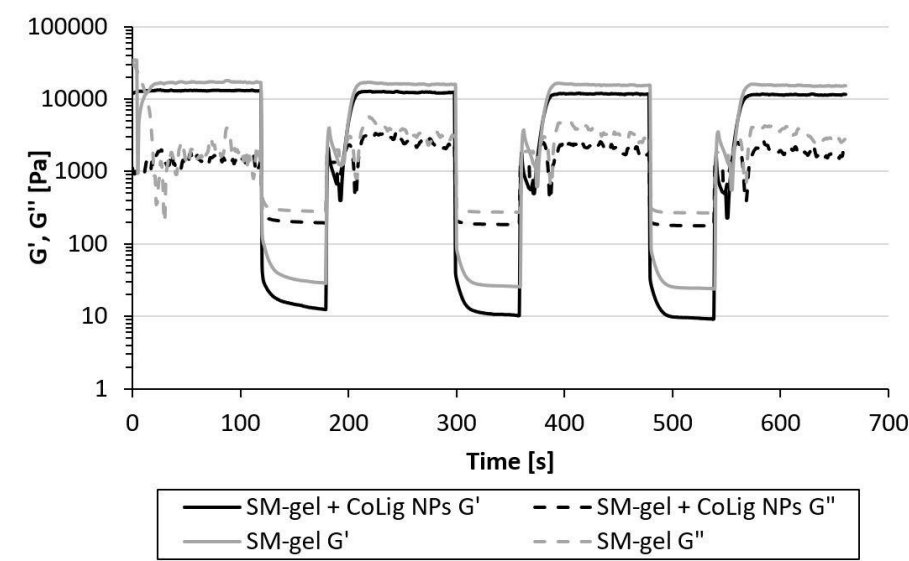

Figure S6. Self-healing strain tests for the SM-gel with and without CoLig NPs.

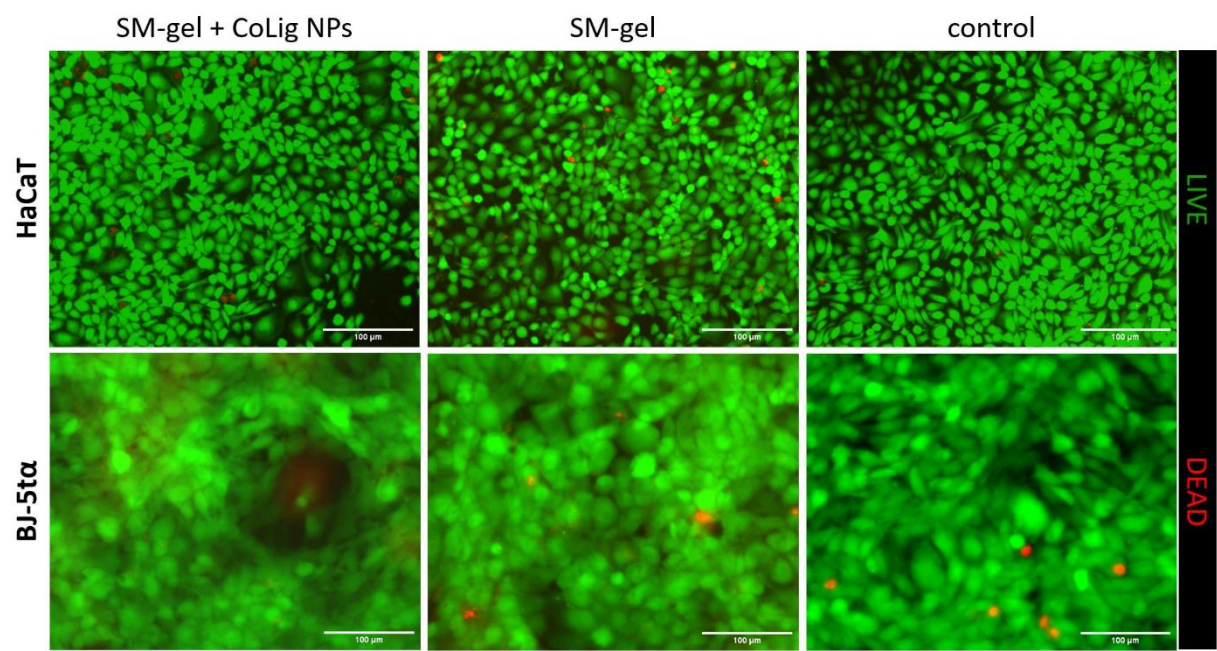

Figure S7. Live/dead assay for human fibroblast (BJ-5ta) and keratinocytes (HaCaT) treated with SM-gel with and without CoLig NPs.
